# Supplementary material for: Phosphorus NMR and ab initio study of pentaphosphorus dichalcogenide halides †
Source: Royal Society of Chemistry journal article supplement (doi:10.1039/b000613k), 2000-01-01
Supplement: tablex4.pdf [file tablex4.pdf]

**Supplementary Table 4.**  $P^2$  and  $\pi$  for Phosphorus-Phosphorus Pairs in  $P_5S_2X$  (1)

| Molecule |       |    | Coupling         | Expt.    | $P^2$         | $\pi$         |
|----------|-------|----|------------------|----------|---------------|---------------|
| $E_a$    | $E_b$ | X  |                  | Coupling | $\times 10^3$ | $\times 10^3$ |
| S        | S     | Cl | ${}^1J(P_A P_B)$ | -193.7   | 4.706         | -2.286        |
| S        | Se    | Cl |                  | -190.3   | 4.747         | -2.404        |
| Se       | S     | Cl |                  | -194.3   | 4.830         | -2.401        |
| Se       | Se    | Cl |                  | -191.3   | 4.914         | -2.487        |
| S        | S     | Br |                  | -191.8   | 4.665         | -2.275        |
| S        | Se    | Br |                  | -188.4   | 4.692         | -2.399        |
| Se       | S     | Br |                  | -192.4   | 4.789         | -2.395        |
| Se       | Se    | Br |                  | -189.3   | 4.858         | -2.478        |
| S        | S     | Cl | ${}^1J(P_A P_E)$ | -168.8   | 4.343         | -2.726        |
| S        | Se    | Cl |                  | -173.4   | 4.409         | -2.609        |
| Se       | S     | Cl |                  | -169.2   | 4.489         | -2.852        |
| Se       | Se    | Cl |                  | -173.5   | 4.556         | -2.732        |
| S        | S     | Br |                  | -169.1   | 4.251         | -2.733        |
| S        | Se    | Br |                  | -174.0   | 4.330         | -2.611        |
| Se       | S     | Br |                  | -169.4   | 4.409         | -2.868        |
| Se       | Se    | Br |                  | -174.4   | 4.462         | -2.742        |
| S        | S     | Cl | ${}^1J(P_B P_E)$ | -179.1   | 4.844         | -1.900        |
| S        | Se    | Cl |                  | -177.4   | 5.055         | -1.890        |
| Se       | S     | Cl |                  | -184.5   | 4.886         | -1.788        |
| Se       | Se    | Cl |                  | -182.6   | 5.098         | -1.778        |
| S        | S     | Br |                  | -173.5   | 4.692         | -1.900        |
| S        | Se    | Br |                  | -171.1   | 4.872         | -1.896        |
| Se       | S     | Br |                  | -178.9   | 4.706         | -1.783        |
| Se       | Se    | Br |                  | -176.8   | 4.928         | -1.786        |

|    |    |    |                                           |        |        |        |
|----|----|----|-------------------------------------------|--------|--------|--------|
| S  | S  | Cl | $^1J(\text{P}_\text{C}\text{P}_\text{D})$ | -274.9 | 10.201 | -2.853 |
| S  | Se | Cl |                                           | -282.1 | 10.241 | -3.139 |
| Se | S  | Cl |                                           | -275.9 | 10.384 | -3.017 |
| Se | Se | Cl |                                           | -283.4 | 10.404 | -3.310 |
| S  | S  | Br |                                           | -265.2 | 9.960  | -3.125 |
| S  | Se | Br |                                           | -272.7 | 10.000 | -3.407 |
| Se | S  | Br |                                           | -266.1 | 10.140 | -3.288 |
| Se | Se | Br |                                           | -273.7 | 10.161 | -3.575 |
| S  | S  | Cl | $^1J(\text{P}_\text{D}\text{P}_\text{E})$ | -396.2 | 10.983 | -4.228 |
| S  | Se | Cl |                                           | -393.1 | 10.795 | -4.258 |
| Se | S  | Cl |                                           | -393.7 | 10.384 | -4.724 |
| Se | Se | Cl |                                           | -390.8 | 10.201 | -4.752 |
| S  | S  | Br |                                           | -386.0 | 10.837 | -4.379 |
| S  | Se | Br |                                           | -382.2 | 10.630 | -4.431 |
| Se | S  | Br |                                           | -383.3 | 10.241 | -4.878 |
| Se | Se | Br |                                           | -379.6 | 10.020 | -4.921 |
| S  | S  | Cl | $^2J(\text{P}_\text{A}\text{P}_\text{C})$ | 73.5   | 2.107  | 4.438  |
| S  | Se | Cl |                                           | 82.7   | 2.228  | 4.705  |
| Se | S  | Cl |                                           | 64.3   | 1.452  | 3.634  |
| Se | Se | Cl |                                           | 73.0   | 1.529  | 3.844  |
| S  | S  | Br |                                           | 73.9   | 2.153  | 4.534  |
| S  | Se | Br |                                           | 83.2   | 2.275  | 4.797  |
| Se | S  | Br |                                           | 65.0   | 1.490  | 3.719  |
| Se | Se | Br |                                           | 73.5   | 1.568  | 3.924  |

This journal is © The Royal Society of Chemistry 2000

|    |    |    |                                             |       |       |       |
|----|----|----|---------------------------------------------|-------|-------|-------|
| S  | S  | Cl | ${}^2J(\text{P}_\text{A}\text{P}_\text{D})$ | 15.3  | 0.973 | 2.398 |
| S  | Se | Cl |                                             | 13.6  | 0.973 | 2.388 |
| Se | S  | Cl |                                             | 21.3  | 1.109 | 2.668 |
| Se | Se | Cl |                                             | 18.9  | 1.102 | 2.636 |
| S  | S  | Br |                                             | 15.9  | 1.011 | 2.485 |
| S  | Se | Br |                                             | 13.9  | 1.011 | 2.474 |
| Se | S  | Br |                                             | 22.1  | 1.156 | 2.764 |
| Se | Se | Br |                                             | 19.8  | 1.149 | 2.726 |
|    |    |    |                                             |       |       |       |
| S  | S  | Cl | ${}^2J(\text{P}_\text{B}\text{P}_\text{C})$ | 59.5  | 1.858 | 3.959 |
| S  | Se | Cl |                                             | 50.3  | 1.267 | 3.239 |
| Se | S  | Cl |                                             | 65.5  | 1.945 | 4.149 |
| Se | Se | Cl |                                             | 55.3  | 1.325 | 3.388 |
| S  | S  | Br |                                             | 59.5  | 1.866 | 3.990 |
| S  | Se | Br |                                             | 50.2  | 1.274 | 3.263 |
| Se | S  | Br |                                             | 65.2  | 1.945 | 4.166 |
| Se | Se | Br |                                             | 55.1  | 1.325 | 3.406 |
|    |    |    |                                             |       |       |       |
| S  | S  | Cl | ${}^2J(\text{P}_\text{B}\text{P}_\text{D})$ | -8.7  | 0.010 | 0.136 |
| S  | Se | Cl |                                             | -12.6 | 0.021 | 0.152 |
| Se | S  | Cl |                                             | -9.7  | 0.005 | 0.106 |
| Se | Se | Cl |                                             | -13.0 | 0.014 | 0.118 |
| S  | S  | Br |                                             | -8.7  | 0.012 | 0.150 |
| S  | Se | Br |                                             | -11.9 | 0.024 | 0.170 |
| Se | S  | Br |                                             | -9.5  | 0.006 | 0.118 |
| Se | Se | Br |                                             | -12.6 | 0.016 | 0.133 |

This journal is © The Royal Society of Chemistry 2000

|    |    |    |                      |      |       |       |
|----|----|----|----------------------|------|-------|-------|
| S  | S  | Cl | ${}^2J(\text{PCPE})$ | 43.5 | 1.391 | 3.888 |
| S  | Se | Cl |                      | 44.1 | 1.444 | 4.020 |
| Se | S  | Cl |                      | 48.6 | 1.467 | 4.065 |
| Se | Se | Cl |                      | 49.8 | 1.521 | 4.199 |
| S  | S  | Br |                      | 44.6 | 1.505 | 4.111 |
| S  | Se | Br |                      | 45.2 | 1.560 | 4.252 |
| Se | S  | Br |                      | 49.4 | 1.584 | 4.294 |
| Se | Se | Br |                      | 50.7 | 1.640 | 4.433 |

---

$P^2$  (Equ. 5) and  $\pi$  (Equ. 6) are for products of coefficients of 3s NAOs obtained from *ab initio* calculations at the RHF/Ahlrichs pTZV level using RHF/Ahlrichs pVDZ geometries. Units of  $\pi$  are Hartree<sup>-1</sup>; observed coupling constants are in Hz.
